# Supplementary material
Source: PubMed Central journal article supplement (PMC4016190)
Supplement: NIHMS571502-supplement-1.pdf [file NIHMS571502-supplement-1.pdf]

## Supplementary Information Titles

|                                 |
|---------------------------------|
| <b>Journal:</b> Nature Medicine |
|---------------------------------|

|                              |                                                                             |
|------------------------------|-----------------------------------------------------------------------------|
| <b>Article Title:</b>        | REDD1 is essential for stress-induced synaptic loss and depressive behavior |
| <b>Corresponding Author:</b> | Ronald S. Duman                                                             |

| <b>Supplementary Item &amp; Number</b> | <b>Title or Caption</b>                                                 |
|----------------------------------------|-------------------------------------------------------------------------|
| Supplementary Figure 1                 | Regulation of the TSC2/REDD1/protein synthesis signaling pathway by CUS |
| Supplementary Figure 2                 | Glucocorticoids regulate REDD1 expression in the PFC                    |
| Supplementary Figure 3                 | REDD1 knock out mice show no baseline behavioral alterations            |
| Supplementary Table 1                  | Summary of demographic information for all postmortem subjects          |
| Supplementary Table 2                  | Complete demographic information for postmortem subjects                |
