# Supplementary material
Source: PubMed Central journal article supplement (PMC4016190)
Supplement: NIHMS571502-supplement-2.pdf [file NIHMS571502-supplement-2.pdf]

Supplementary information for:

**REDD1 is essential for stress-induced synaptic loss and depressive behavior**

*Kristie T. Ota<sup>1</sup>, Rong-Jian Liu<sup>1</sup>, Bhavya Voleti<sup>1</sup>, Jaime G. Maldonado-Aviles<sup>1</sup>, Vanja Duric<sup>1,2</sup>, Masaaki Iwata<sup>1</sup>, Sophie Dutheil<sup>1</sup>, Catharine Duman<sup>1</sup>, Steve Boikess<sup>3</sup>, David A. Lewis<sup>4</sup>, Craig A. Stockmeier<sup>5</sup>, Ralph J. DiLeone<sup>1</sup>, Christopher Rex<sup>3</sup>, George K. Aghajanian<sup>1</sup>, Ronald S. Duman<sup>1\*</sup>*

<sup>1</sup> Laboratory of Molecular Psychiatry, Center for Genes and Behavior, Departments of Psychiatry and Neurobiology, Yale University School of Medicine, 34 Park Street, New Haven, CT 06508, USA.

<sup>2</sup> Departments of Physiology and Pharmacology, Des Moines University, Des Moines, IA, USA.

<sup>3</sup> Afraxis, Inc. La Jolla, CA, USA.

<sup>4</sup> Department of Psychiatry, University of Pittsburgh, PA, USA.

<sup>5</sup> Department of Psychiatry and Human Behavior, University of Mississippi Medical Center, Jackson, MS, USA.

\*To whom correspondence should be addressed: E-mail: [ronald.duman@yale.edu](mailto:ronald.duman@yale.edu).

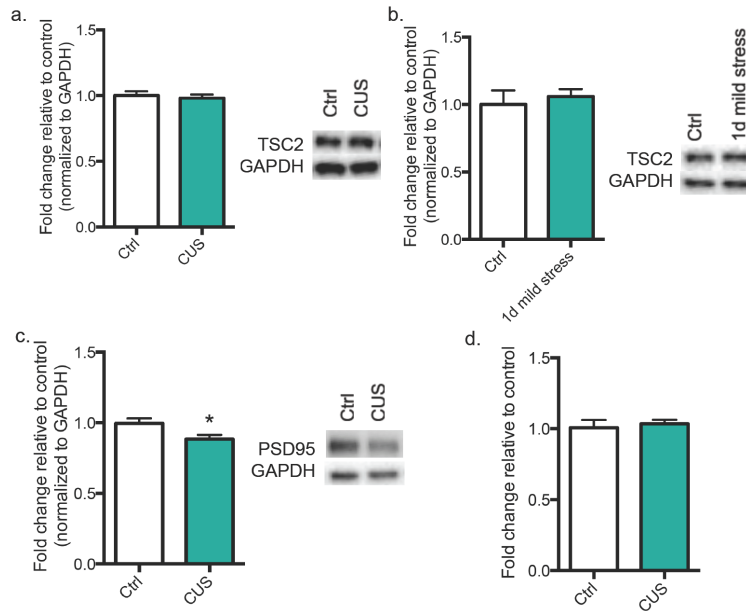

*Supplementary Figure 1. Regulation of the TSC2/REDD1/protein synthesis signaling pathway by CUS. (a)* Rats were subjected to 21 d of CUS ( $n=10$ ) or regular handling (control) ( $n=12$ ) then sacrificed 4 h following the final stressor. Mean ( $\pm$  SEM) fold change for TSC2 protein from PFC dissections. Here, protein levels have been normalized to GAPDH. Representative blots for TSC2 and GAPDH are displayed to the right. *(b)* Rats were subjected to 1 d of mild stress ( $n=6$ ) or handling (control) ( $n=6$ ) then sacrificed 4 h following the final stressor. Mean ( $\pm$  SEM) fold change for TSC2 protein from PFC dissections. Here, protein levels have been normalized to GAPDH. Representative blots for TSC2 and GAPDH are displayed to the right. *(c)* Rats were subjected to 21 d of CUS ( $n=14$ ) or regular handling (control) ( $n=14$ ) then sacrificed 4 h following the final stressor. Mean ( $\pm$  SEM) fold change for PSD-95 protein from PFC dissections. Here, protein levels have been normalized to GAPDH. Representative blots for PSD-95 and GAPDH are displayed to the right. *(d)* Rats received 21 d of CUS ( $n=8$ ) or regular handling (control) ( $n=8$ ) then sacrificed 4 h following the final stressor. Results are mean  $\pm$  SEM fold change of hippocampal REDD1 mRNA relative to control. (\*)  $p < 0.05$  relative to control.

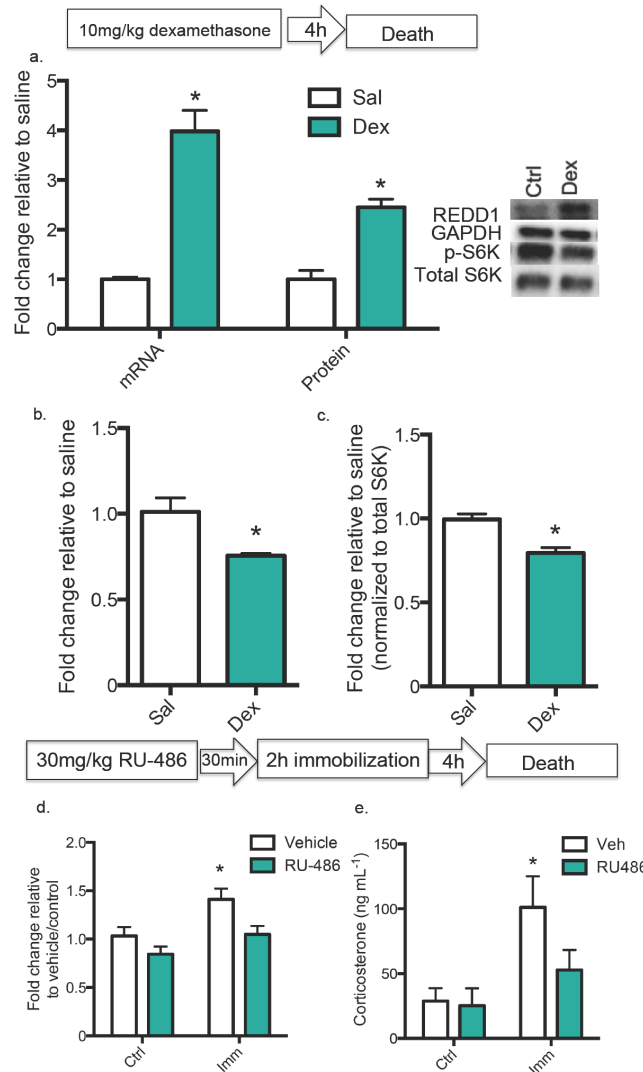

*Supplementary Figure 2. Glucocorticoids regulate REDD1 expression in the PFC. (a)* Rats were given one 10 mg kg<sup>-1</sup> injection of dexamethasone (Dex) then sacrificed 4 h following the final stressor. Control animals were injected with saline (Sal). Mean ( $\pm$  SEM) fold change in REDD1 mRNA and protein from PFC dissections relative to control for either Dex ( $n=6$ ) or Sal ( $n=6$ ) rats. Here, protein levels have been normalized to GAPDH. Representative blots for REDD1 and GAPDH are displayed to the right. **(b)** Results are mean  $\pm$  SEM fold change of PFC REDD2 mRNA [Dex  $n=5$ ; Sal  $n=6$ ] relative to Sal. **(c)** Mean ( $\pm$  SEM) fold change in phospho-S6K PFC dissections for either Dex ( $n=12$ ) or Sal ( $n=12$ ) rats. Here, protein levels have been normalized to

total S6K. Representative blots for p-S6K and total S6K are displayed above. **(d)** Rats were given one  $30 \text{ mg kg}^{-1}$  injection of RU-486, immobilized 30 min later for 2 h, then sacrificed 4 h later. Results are mean  $\pm$  SEM fold change of PFC REDD1 mRNA [Veh/Ctrl  $n=8$ ; RU/Ctrl  $n=6$ ; Veh/Imm  $n=10$ ; RU/Imm  $n=8$ ] relative to Veh/Ctrl. **(e)** Mean  $\pm$  SEM serum corticosterone in  $\text{ng mL}^{-1}$  [Veh/Ctrl  $n=8$ ; RU/Ctrl  $n=5$ ; Veh/Imm  $n=9$ ; RU/Imm  $n=7$ ]. (\*)  $p < 0.05$  relative to control.

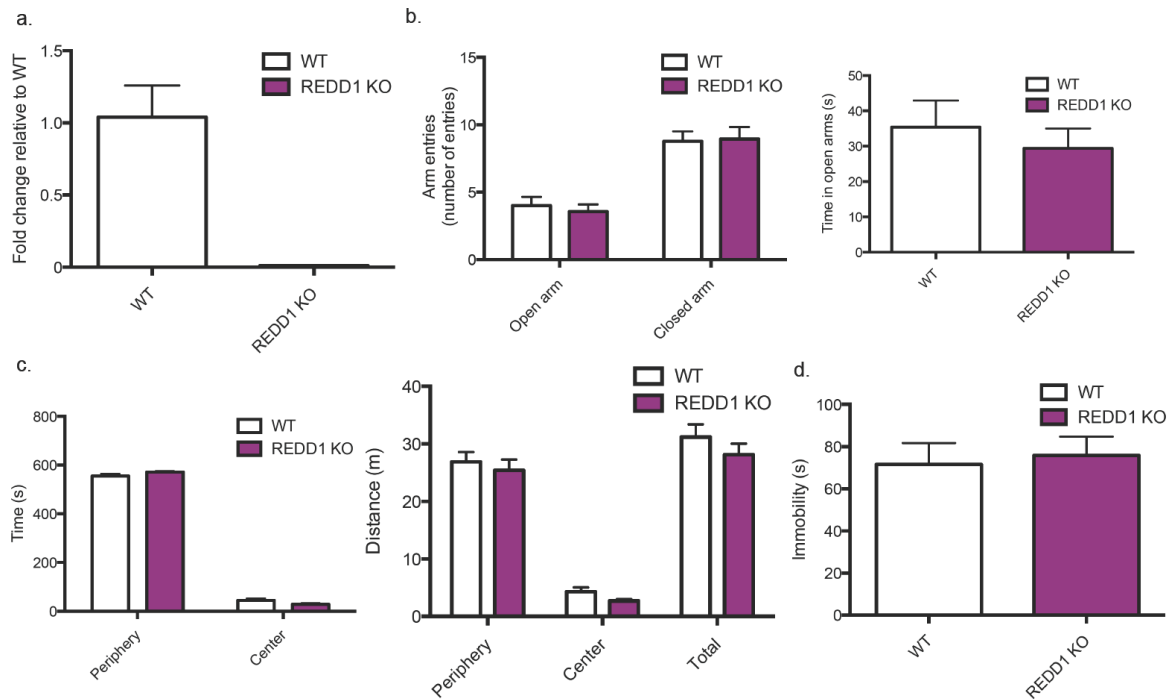

*Supplementary Figure 3. REDD1 knock out mice show no baseline behavioral alterations. (a)* Mean  $\pm$  SEM fold change ( $0.01 \pm 0.002$ ) PFC REDD1 mRNA [WT  $n=3$ ; REDD1 KO  $n=4$ ] relative to control. *(b) Left.* Mean number of entries ( $\pm$  SEM) into the open and closed arms of the elevated plus maze is depicted for WT ( $n=14$ ) and REDD1 KO ( $n=19$ ) mice. *Right.* Mean time ( $\pm$  SEM) in open arms of the elevated plus maze is depicted for WT ( $n=14$ ) and REDD1 KO ( $n=19$ ) mice. *(c) Left.* Mean time ( $\pm$  SEM) in periphery and center of open field box is depicted for WT ( $n=14$ ) and REDD1 KO ( $n=19$ ) mice. *Right.* Mean distance traveled ( $\pm$  SEM) in the periphery, center, and total, of the open field box is depicted for WT ( $n=14$ ) and REDD1 KO ( $n=19$ ) mice. *(d)* Mean number of seconds immobile ( $\pm$  SEM) during the forced swim test is depicted for WT ( $n=30$ ) and REDD1 KO ( $n=36$ ) mice.

| Group   | Age (yr)   | Gender  | PMI (h)    | pH        | Cause of death (suicide/other) | Medications |
|---------|------------|---------|------------|-----------|--------------------------------|-------------|
| Control | 48.45±1.84 | 22M/16F | 18.97±0.84 | 6.66±0.04 | 0/38                           | n.d.        |
| MDD     | 47.89±1.87 | 18M/20F | 18.32±0.87 | 6.56±0.04 | 12/26                          | 21          |

*Supplementary Table 1. Summary of demographic information for all postmortem subjects. Case demographics of MDD subjects. Abbreviations: PMI, post-mortem interval; M, male; F, female; n.d., no psychotropic medication detected; MDD, major depressive disorder.*

a. Cohort 1 Control

| Age        | Gender       | PMI (Hours)  | Tissue pH   | Psychotropic Drugs | Suicide |
|------------|--------------|--------------|-------------|--------------------|---------|
| 60         | M            | 10           | 6.8         | n.d.               | N       |
| 22         | M            | 20           | 7.0         | n.d.               | N       |
| 64         | F            | 20           | 6.7         | n.d.               | N       |
| 51         | M            | 16           | 6.5         | n.d.               | N       |
| 58         | F            | 23           | 6.4         | n.d.               | N       |
| 39         | F            | 25           | 6.8         | n.d.               | N       |
| 55         | F            | 11           | 6.8         | n.d.               | N       |
| 47         | M            | 17           | 6.6         | n.d.               | N       |
| 51         | F            | 8            | 6.6         | n.d.               | N       |
| 52         | F            | 23           | 7.1         | n.d.               | N       |
| 23         | F            | 9            | 6.1         | n.d.               | N       |
| 54         | M            | 21           | 6.3         | n.d.               | N       |
| 46         | F            | 15           | 6.8         | n.d.               | N       |
| 37         | F            | 24           | 6.7         | n.d.               | N       |
| 43         | M            | 22           | 6.6         | n.d.               | N       |
| 40         | F            | 17           | 6.8         | n.d.               | N       |
| 56         | M            | 16           | 6.8         | n.d.               | N       |
| 45         | F            | 12           | 6.7         | n.d.               | N       |
| 46         | M            | 22           | 6.3         | n.d.               | N       |
| 58         | F            | 19           | 6.7         | n.d.               | N       |
| 65         | F            | 19           | 6.6         | n.d.               | N       |
| 53         | M            | 23           | 6.8         | n.d.               | N       |
| 56         | M            | 23           | 6.5         | n.d.               | N       |
| 57         | M            | 16           | 6.2         | n.d.               | N       |
| 36         | F            | 15           | 6.4         | n.d.               | N       |
| 45         | M            | 17           | 6.6         | n.d.               | N       |
| 37         | M            | 21           | 6.6         | n.d.               | N       |
| <b>Avg</b> | <b>48.00</b> | <b>17.81</b> | <b>6.62</b> |                    |         |
| <b>SEM</b> | <b>2.11</b>  | <b>0.92</b>  | <b>0.05</b> |                    |         |

Cohort 1 MDD

| Age        | Gender       | PMI (Hours)  | Tissue pH   | Psychotropic drugs | Suicide |
|------------|--------------|--------------|-------------|--------------------|---------|
| 57         | M            | 13           | 7.1         | n.d.               | Y       |
| 24         | M            | 13           | 6.9         | n.d.               | Y       |
| 65         | F            | 18           | 7.0         | Y                  | N       |
| 47         | M            | 11           | 6.8         | n.d.               | N       |
| 54         | F            | 18           | 6.2         | Y                  | N       |
| 40         | F            | 22           | 6.6         | n.d.               | N       |
| 53         | F            | 12           | 6.7         | Y                  | N       |
| 46         | M            | 16           | 6.3         | n.d.               | Y       |
| 52         | F            | 10           | 6.5         | Y                  | N       |
| 49         | F            | 23           | 6.4         | Y                  | N       |
| 26         | F            | 13           | 6.4         | Y                  | Y       |
| 57         | M            | 16           | 6.6         | Y                  | N       |
| 47         | F            | 22           | 6.6         | n.d.               | Y       |
| 28         | F            | 25           | 6.6         | n.d.               | N       |
| 44         | M            | 19           | 6.5         | n.d.               | N       |
| 40         | F            | 11           | 6.5         | Y                  | N       |
| 58         | M            | 13           | 6.8         | Y                  | N       |
| 39         | F            | 13           | 6.4         | Y                  | Y       |
| 46         | M            | 23           | 6.6         | Y                  | N       |
| 50         | F            | 19           | 6.4         | Y                  | N       |
| 64         | F            | 12           | 6.6         | Y                  | N       |
| 51         | M            | 25           | 6.5         | n.d.               | N       |
| 55         | M            | 24           | 6.5         | n.d.               | N       |
| 61         | M            | 16           | 6.6         | n.d.               | N       |
| 37         | F            | 16           | 6.6         | Y                  | N       |
| 42         | M            | 14           | 6.4         | Y                  | Y       |
| 36         | M            | 20           | 6.8         | Y                  | N       |
| <b>Avg</b> | <b>46.96</b> | <b>16.91</b> | <b>6.57</b> |                    |         |
| <b>SEM</b> | <b>2.10</b>  | <b>0.92</b>  | <b>0.04</b> |                    |         |

b. Cohort 2 Control

| Age        | Gender       | PMI (Hours)  | Tissue pH   | Psychotropic Drugs | Suicide |
|------------|--------------|--------------|-------------|--------------------|---------|
| 38         | M            | 30           | 6.7         | n.d.               | N       |
| 33         | M            | 23           | 6.9         | n.d.               | N       |
| 54         | M            | 17           | 6.9         | n.d.               | N       |
| 50         | F            | 27           | 6.7         | n.d.               | N       |
| 69         | M            | 18           | 6.7         | n.d.               | N       |
| 54         | M            | 26           | 6.5         | n.d.               | N       |
| 32         | M            | 25           | 6.9         | n.d.               | N       |
| 39         | M            | 21           | 6.7         | n.d.               | N       |
| 60         | F            | 19           | 6.4         | n.d.               | N       |
| 66         | M            | 12           | 7.2         | n.d.               | N       |
| 50         | M            | 22           | 6.8         | n.d.               | N       |
| <b>Avg</b> | <b>49.55</b> | <b>21.82</b> | <b>6.76</b> |                    |         |
| <b>SEM</b> | <b>3.84</b>  | <b>1.55</b>  | <b>0.06</b> |                    |         |

Cohort 2 MDD

| Age        | Gender       | PMI (Hours)  | Tissue pH   | Psychotropic drugs | Suicide |
|------------|--------------|--------------|-------------|--------------------|---------|
| 33         | M            | 18           | 6.8         | Y                  | N       |
| 36         | M            | 11           | 7.0         | n.d.               | N       |
| 54         | M            | 23           | 6.2         | Y                  | N       |
| 50         | F            | 23           | 6.8         | Y                  | Y       |
| 73         | F            | 17           | 6.6         | Y                  | N       |
| 52         | M            | 17           | 6.5         | n.d.               | Y       |
| 34         | F            | 24           | 6.3         | n.d.               | Y       |
| 42         | F            | 24           | 6.6         | n.d.               | Y       |
| 63         | F            | 24           | 6.3         | Y                  | N       |
| 65         | M            | 30           | 6.2         | n.d.               | Y       |
| 50         | F            | 28           | 6.5         | n.d.               | N       |
| <b>Avg</b> | <b>50.18</b> | <b>21.75</b> | <b>6.53</b> |                    |         |
| <b>SEM</b> | <b>3.99</b>  | <b>1.66</b>  | <b>0.08</b> |                    |         |

Supplementary Table 2. Complete demographic information for postmortem subjects. (a)

Demographic information (age, gender, PMI, tissue pH, psychotropic drugs, and suicide) for cohort 1 subjects. (b) Demographic information (age, gender, PMI, tissue pH, psychotropic drugs, and suicide) for cohort 2 subjects.
